# Supplementary material for: PPARα and PPARγ are expressed in midbrain dopamine neurons and modulate dopamine- and cannabinoid-mediated behavior in mice
Source: Springer Nature journal article supplement (doi:10.1038/s41380-023-02182-0), 2023-07-21
Supplement: MOESM11 [file 41380_2023_2182_MOESM11_ESM.docx]

**Supplementary Table 1.**Statistical analysis results by RM ANOVAs over time and drug dose

| **Figure**[**2**](https://bpspubs.onlinelibrary.wiley.com/doi/10.1111/bph.14958#bph14958-fig-0001)  (oICSS) | **Drug treatment**  **main effect** | **Time (Hz) main effect** | **Treatment × time**  **interaction** |
| --- | --- | --- | --- |
| Fig. 2D | *F*2, 49 = 5.185; *P* <0.01 | *F*5, 245= 117.2; *P* <0.001 | *F*10, 245 = 2.53; *P* <0.01 |
| Fig. 2E | *F*3, 37 = 0.4403; *P* =0.7255 | *F*5, 185 = 123.1; *P* <0.001 | *F*15, 185 = 0.43; *P* =0.969 |
| Fig. 2F | *F*3,41 = 8.15; *P* <0.001 | *F*5, 205 = 78.49; *P* <0.001 | *F*15, 205 = 7.59; *P* <0.001 |
| Fig. 2G | *F*3, 60 = 3.83; *P* <0.05 | *F*5, 300 = 161.9; *P* <0.001 | *F*15, 300 = 2.64; *P* <0.001 |
| Fig. 2I | *F*2, 33 = 0.044; *P* =0.957 | *F*5, 165 = 153.9; *P* <0.001 | *F*10, 165 = 0.23; *P* =0.993 |
| Fig. 2J | *F*3, 60 = 3.795; *P* <0.05 | *F*5, 300 = 168.4; *P* <0.001 | *F*15, 300 = 2.41; *P* <0.01 |
| Fig. 2L | *F*2, 33 = 4.582; *P* <0.05 | *F*5, 165 = 108.4; *P* <0.001 | *F*10, 165 = 4.55; *P* <0.001 |
