# Supplementary material for: PPARα and PPARγ are expressed in midbrain dopamine neurons and modulate dopamine- and cannabinoid-mediated behavior in mice
Source: Springer Nature journal article supplement (doi:10.1038/s41380-023-02182-0), 2023-07-21
Supplement: MOESM12 [file 41380_2023_2182_MOESM12_ESM.docx]

**Supplementary Table 2.**Statistical analysis results by two-way RM ANOVAs over time and drug dose

| **Figure**[**5**](https://bpspubs.onlinelibrary.wiley.com/doi/10.1111/bph.14958#bph14958-fig-0001)  (Locomotion) | **Drug treatment**  **main effect** | **Time main effect** | **Treatment × time**  **interaction** |
| --- | --- | --- | --- |
| Fig. 5A | *F*2,21 = 1.28; *P* >0.05 | *F*11,231 = 5.78; *P* <0.001 | *F*22,231 = 3.48; *P* <0.001 |
| Fig. 5B | *F*2,21 = 0.44; *P* >0.05 | *F*11,231 = 13.05; *P* <0.001 | *F*22,231 = 5.36; *P* <0.001 |
| Fig. 5C | *F*2,21 = 17.39; *P* <0.001 | *F*11,231 = 7.84; *P* <0.001 | *F*22,231 = 4.78; *P* <0.001 |
| Fig. 5D | *F*2,21 = 5.67; *P* <0.01 | *F*11,231 = 8.15; *P* <0.001 | *F*22,231 = 3.49; *P* <0.001 |
| Fig. 5E | *F*3,28 = 5.86; *P* < 0.01 | *F*11,308 = 15.37; *P* <0.001 | *F*33,308 = 4.65; *P* <0.001 |
| Fig. 5F | *F*3,28 = 3.67; *P* < 0.05 | *F*11,308 = 10.02; *P* <0.001 | *F*33,308 = 2.27; *P* <0.001 |
