# Supplementary material for: PPARα and PPARγ are expressed in midbrain dopamine neurons and modulate dopamine- and cannabinoid-mediated behavior in mice
Source: Springer Nature journal article supplement (doi:10.1038/s41380-023-02182-0), 2023-07-21
Supplement: MOESM13 [file 41380_2023_2182_MOESM13_ESM.docx]

**Supplementary Table 3.**Statistical analysis results by two-way RM ANOVAs over time and GW6471 dose

| **Figure S8**  (D9-THC tetrad) | **Drug treatment**  **main effect** | **Time main effect** | **Treatment × time**  **interaction** |
| --- | --- | --- | --- |
| Fig. S8-A | *F*2, 21 = 0.81; *P* =0.458 | *F*4, 84 = 4.32; *P* <0.01 | *F*8, 84 = 1.24; *P* =0.287 |
| Fig. S8-B | *F*2, 21 = 7.78; *P* <0.01 | *F*4, 84 = 39.39; *P* <0.001 | *F*8, 84 = 3.18; *P* <0.01 |
| Fig. S8-C | *F*2, 21 = 1.27; *P* =0.303 | *F*4, 84 = 36.82; *P* <0.001 | *F*8, 84 = 0.84; *P* =0.568 |
| Fig. S8-D | *F*2, 21 = 1.16; *P* =0.334 | *F*4, 84 = 2.03; *P* =0.097 | *F*8, 84 = 0.62; *P* =0.762 |
| Fig. S8-E | *F*2, 21 = 0.25; *P* =0.781 | *F*4, 84 = 7.89; *P* <0.001 | *F*8, 84 = 0.55; *P* =0.814 |
| Fig. S8-F | *F*2, 21 = 2.89; *P* =0.078 | *F*4, 84 = 23.58; *P* <0.001 | *F*8, 84 = 0.84; *P* =0.574 |
| Fig. S8-G | *F*2, 21 = 2.58; *P* =0.099 | *F*4, 84 = 9.17; *P* <0.001 | *F*8, 84 = 1.43; *P* =0.196 |
| Fig. S8-H | *F*2, 21 = 0.25; *P* =0.784 | *F*4, 84 = 48.02; *P* <0.001 | *F*8, 84 = 0.16; *P* =0.995 |
| Fig. S8-I | *F*2, 21 = 0.25; *P* =0.782 | *F*4, 84 = 168.19; *P* <0.001 | *F*8, 84 = 0.32; *P* =0.955 |
| Fig. S8-J | *F*2, 21 = 0.69; *P* =0.512 | *F*4, 84 = 0.44; *P* =0.782 | *F*8, 84 = 0.54; *P* =0.826 |
| Fig. S8-K | *F*2, 21 = 0.67; *P* =0.522 | *F*4, 84 = 44.59; *P* <0.001 | *F*8, 84 = 0.82; *P* =0.590 |
| Fig. S8-L | *F*2, 21 = 1.28; *P* =0.300 | *F*4, 84 = 82.86; *P* <0.001 | *F*8, 84 = 1.13; *P* =0.349 |
